# Supplementary material for: KPNB1 mediates PER/CRY nuclear translocation and circadian clock function
Source: eLife journal article supplement (doi:10.7554/elife.08647), 2015-08-29
Supplement: supp [file elife-08647-supp-v1.zip › elife_poa_e08647_Supplementary_File_1.pdf]

## Supplementary File 1

| Genotype                                     | n  | Rhythmic Flies (%) <sup>1</sup> | Period (hr) ± SEM | Power (FFT) ± SEM          |
|----------------------------------------------|----|---------------------------------|-------------------|----------------------------|
| ketel RNAi/+ ; dicer/+                       | 16 | 100                             | 23.22 ± 0.04      | 0.112 ± 0.011              |
| <i>Pdf</i> -GAL4/+ ; dicer/+                 | 26 | 100                             | 23.85 ± 0.05      | 0.059 ± 0.005              |
| <i>Pdf</i> -GAL4/ketel RNAi; dicer/+         | 21 | 38.1                            | 23.35 ± 0.15      | 0.022 ± 0.004 <sup>2</sup> |
| TUG/+ ; dicer/+                              | 26 | 100                             | 24.03 ± 0.06      | 0.119 ± 0.009              |
| TUG/ketel RNAi; dicer/+                      | 19 | 0                               | -                 | -                          |
| ketel RNAi/+ ; <i>Pdf</i> -GS/dicer (+EtOH)  | 16 | 100                             | 23.68 ± 0.04      | 0.039 ± 0.004              |
| ketel RNAi/+ ; <i>Pdf</i> -GS/dicer (+RU486) | 16 | 18.7                            | 23.75 ± 0.09      | 0.014 ± 0.001 <sup>3</sup> |

<sup>1</sup> Flies with FFT value > 0.01 are counted as a rhythmic.

<sup>2</sup> P < 0.001 compared to both ketel RNAi/+ ; dicer/+ and *Pdf*-GAL4/+ ; dicer/+ controls, by Student's t-test

<sup>3</sup> The flies became arrhythmic 6-7 days after transferring to DD. Periods and FFTs after 7 days in DD are shown. P < 0.05 compared to EtOH-treated control flies, by Student's t-test
