# Supplementary figures and images for: KPNB1 mediates PER/CRY nuclear translocation and circadian clock function
Source: eLife journal article supplement (doi:10.7554/elife.08647), 2015-08-29

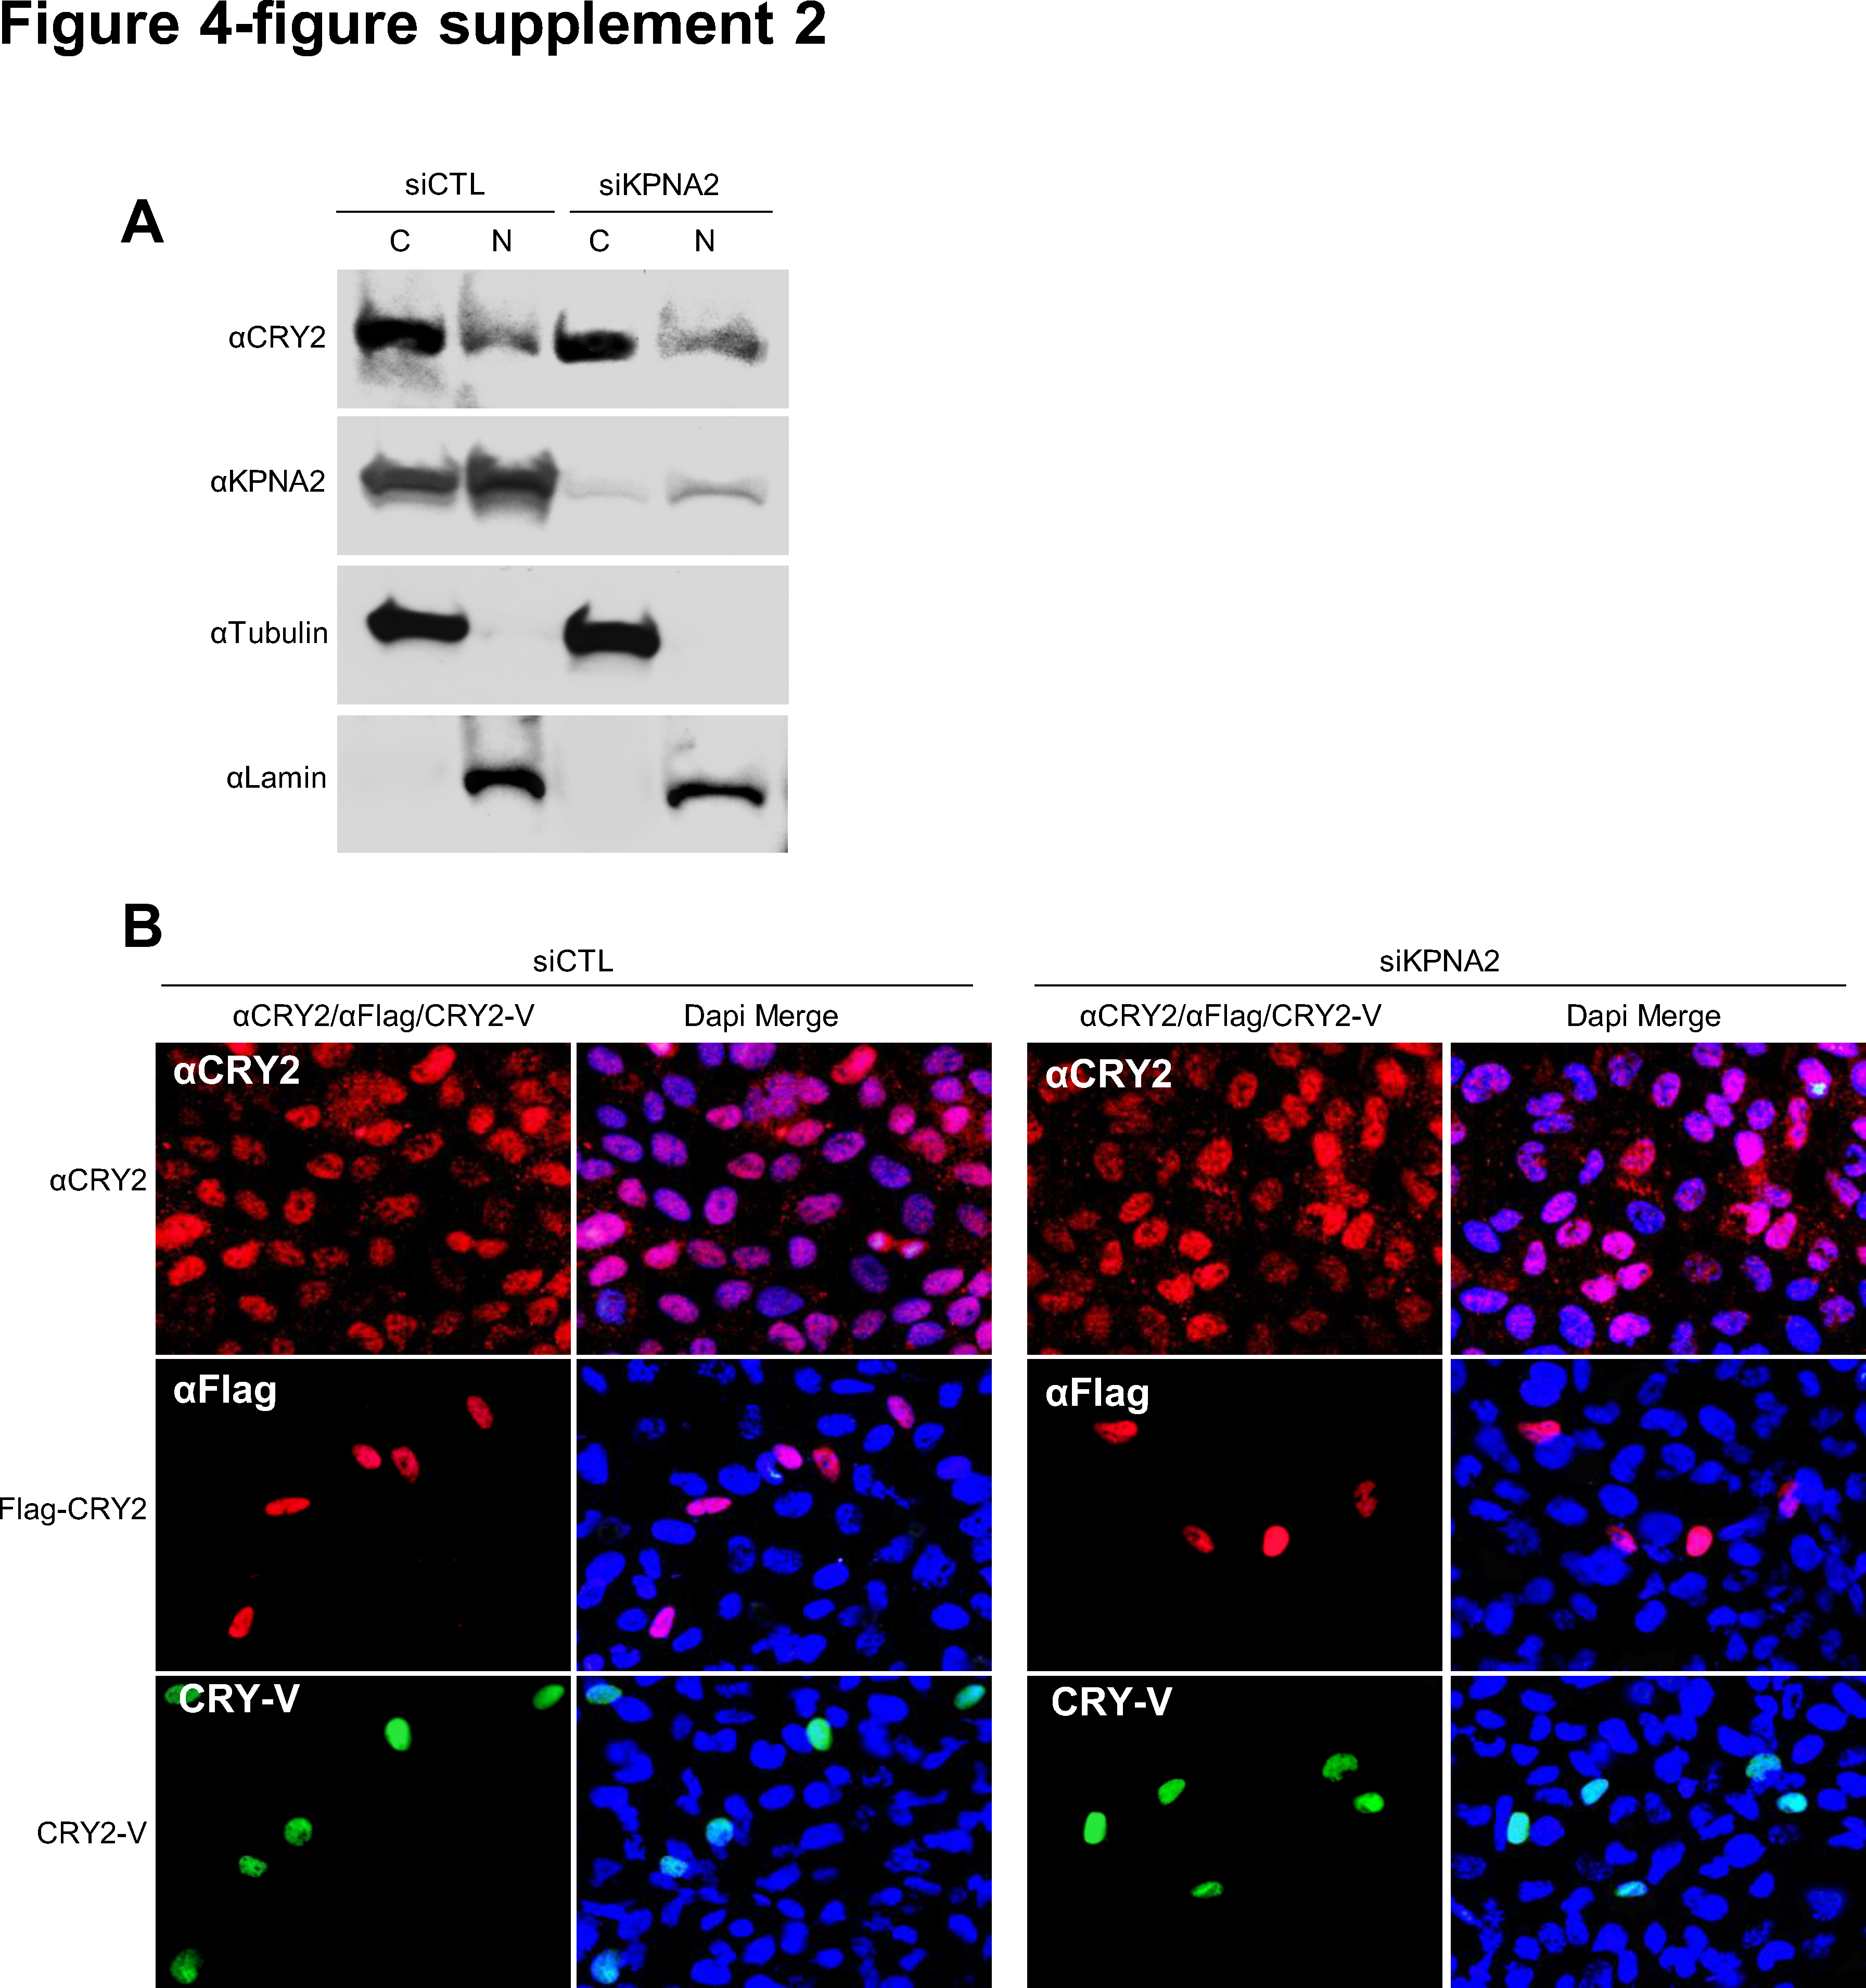

Supplement: supp [file elife-08647-supp-v1.zip › elife_poa_e08647_Figure_4_figure_supplement_2.tif]

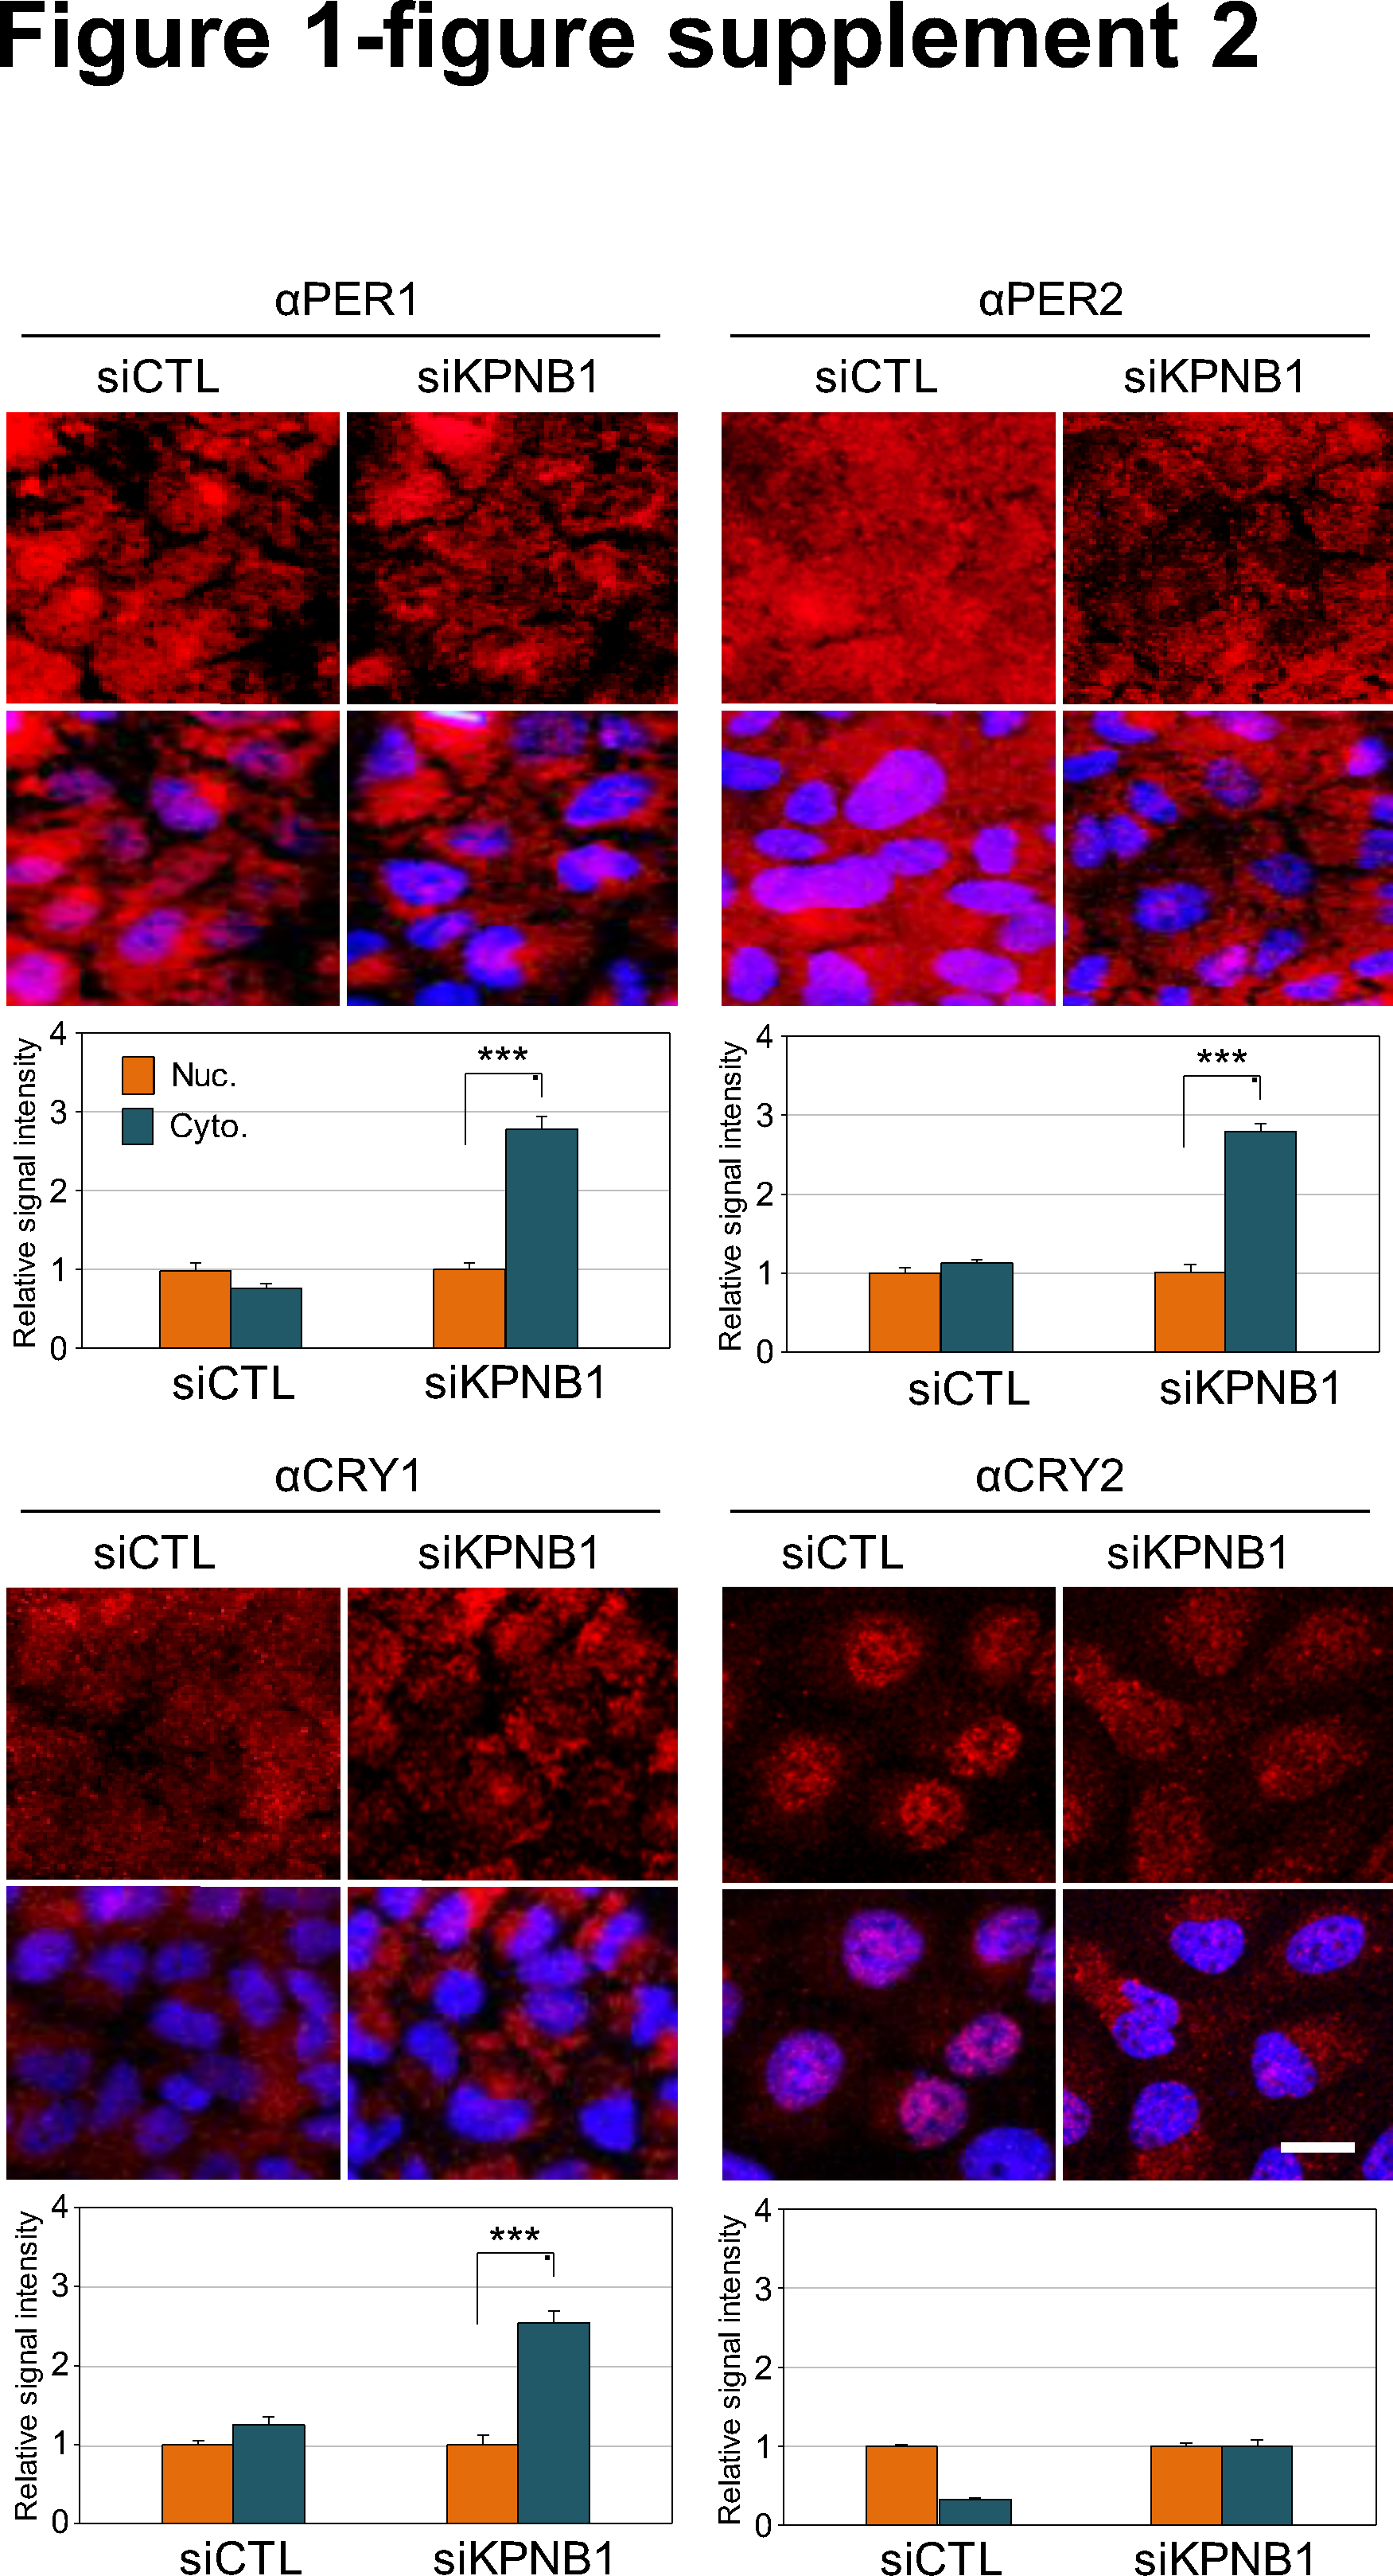

Supplement: supp [file elife-08647-supp-v1.zip › elife_poa_e08647_Figure_1_figure_supplement_2.tif]

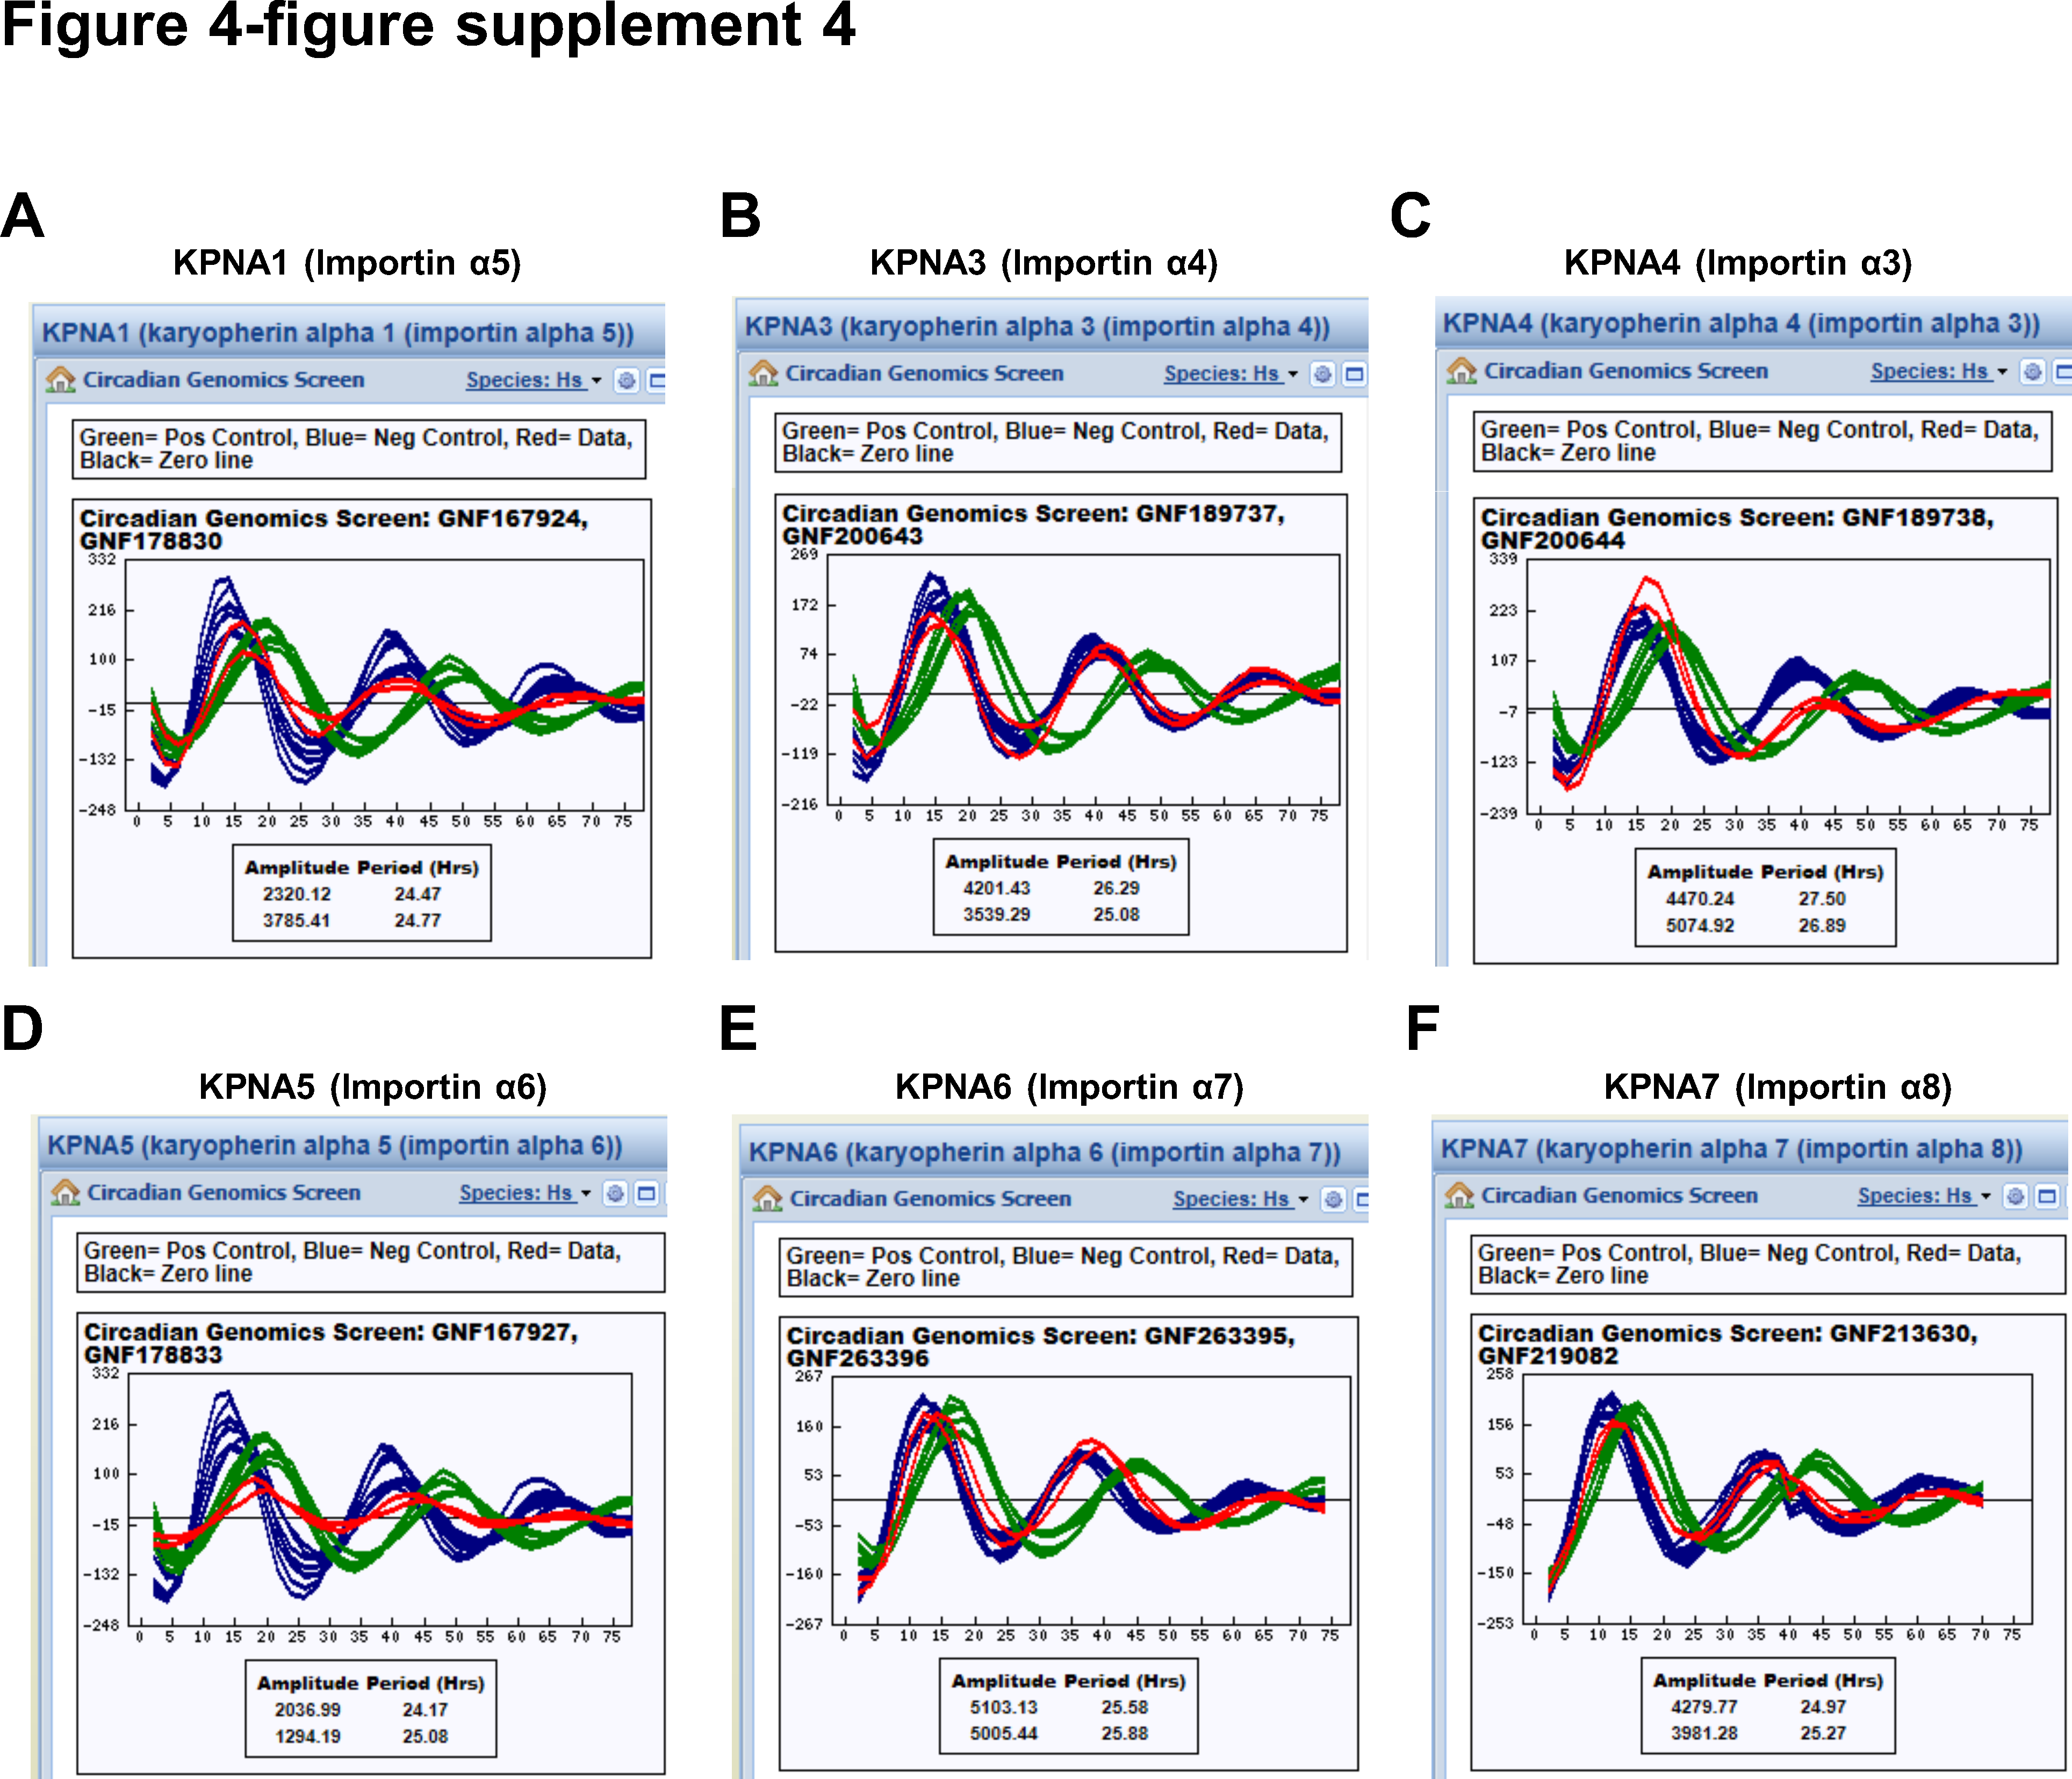

Supplement: supp [file elife-08647-supp-v1.zip › elife_poa_e08647_Figure_4_figure_supplement_4.tif]

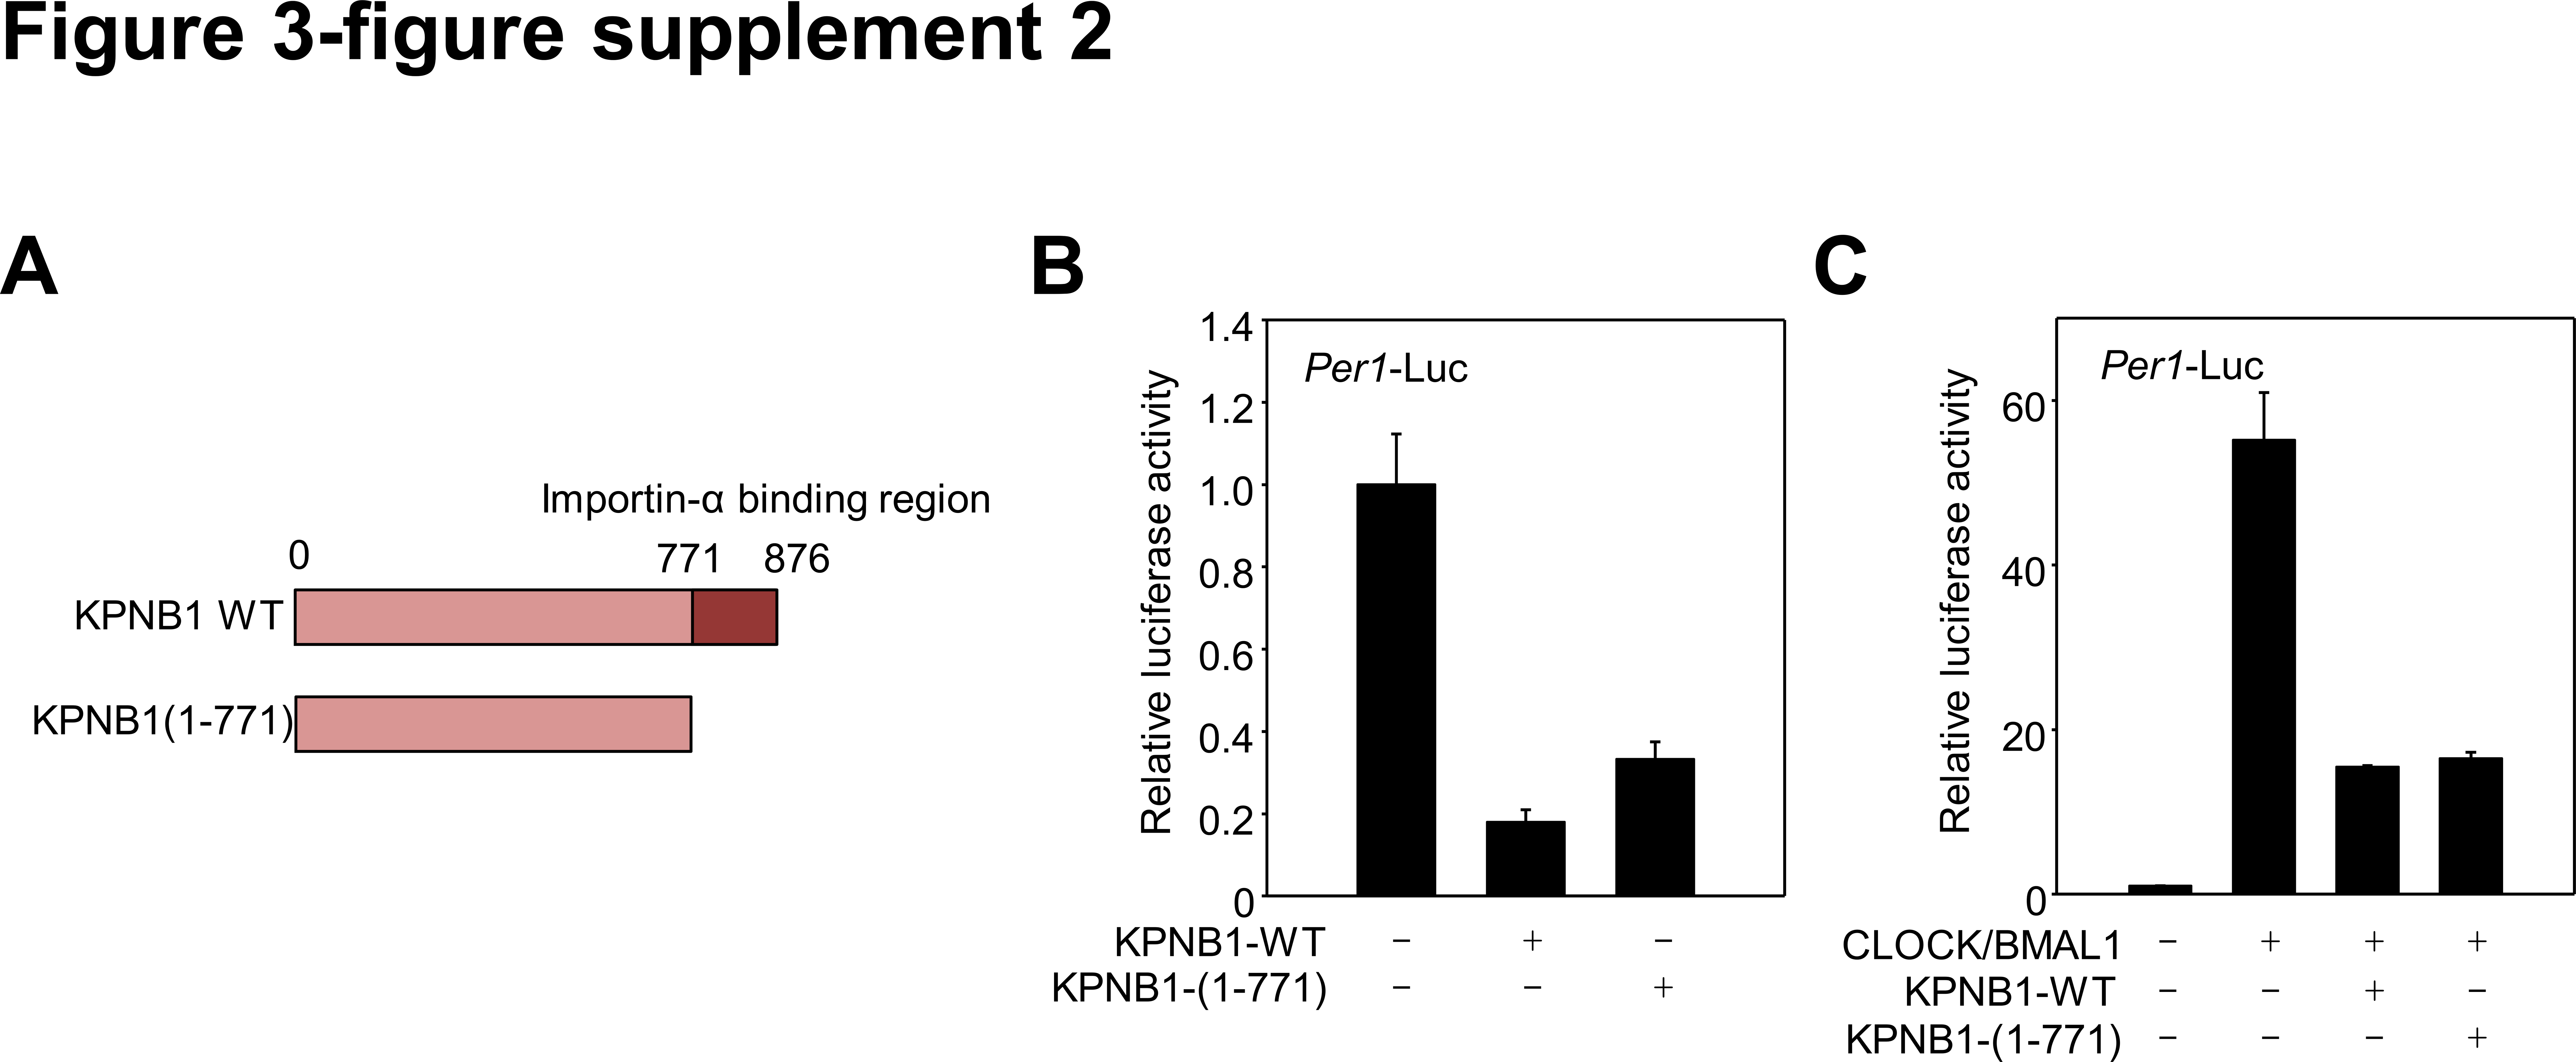

Supplement: supp [file elife-08647-supp-v1.zip › elife_poa_e08647_Figure_3_figure_supplement_2.tif]

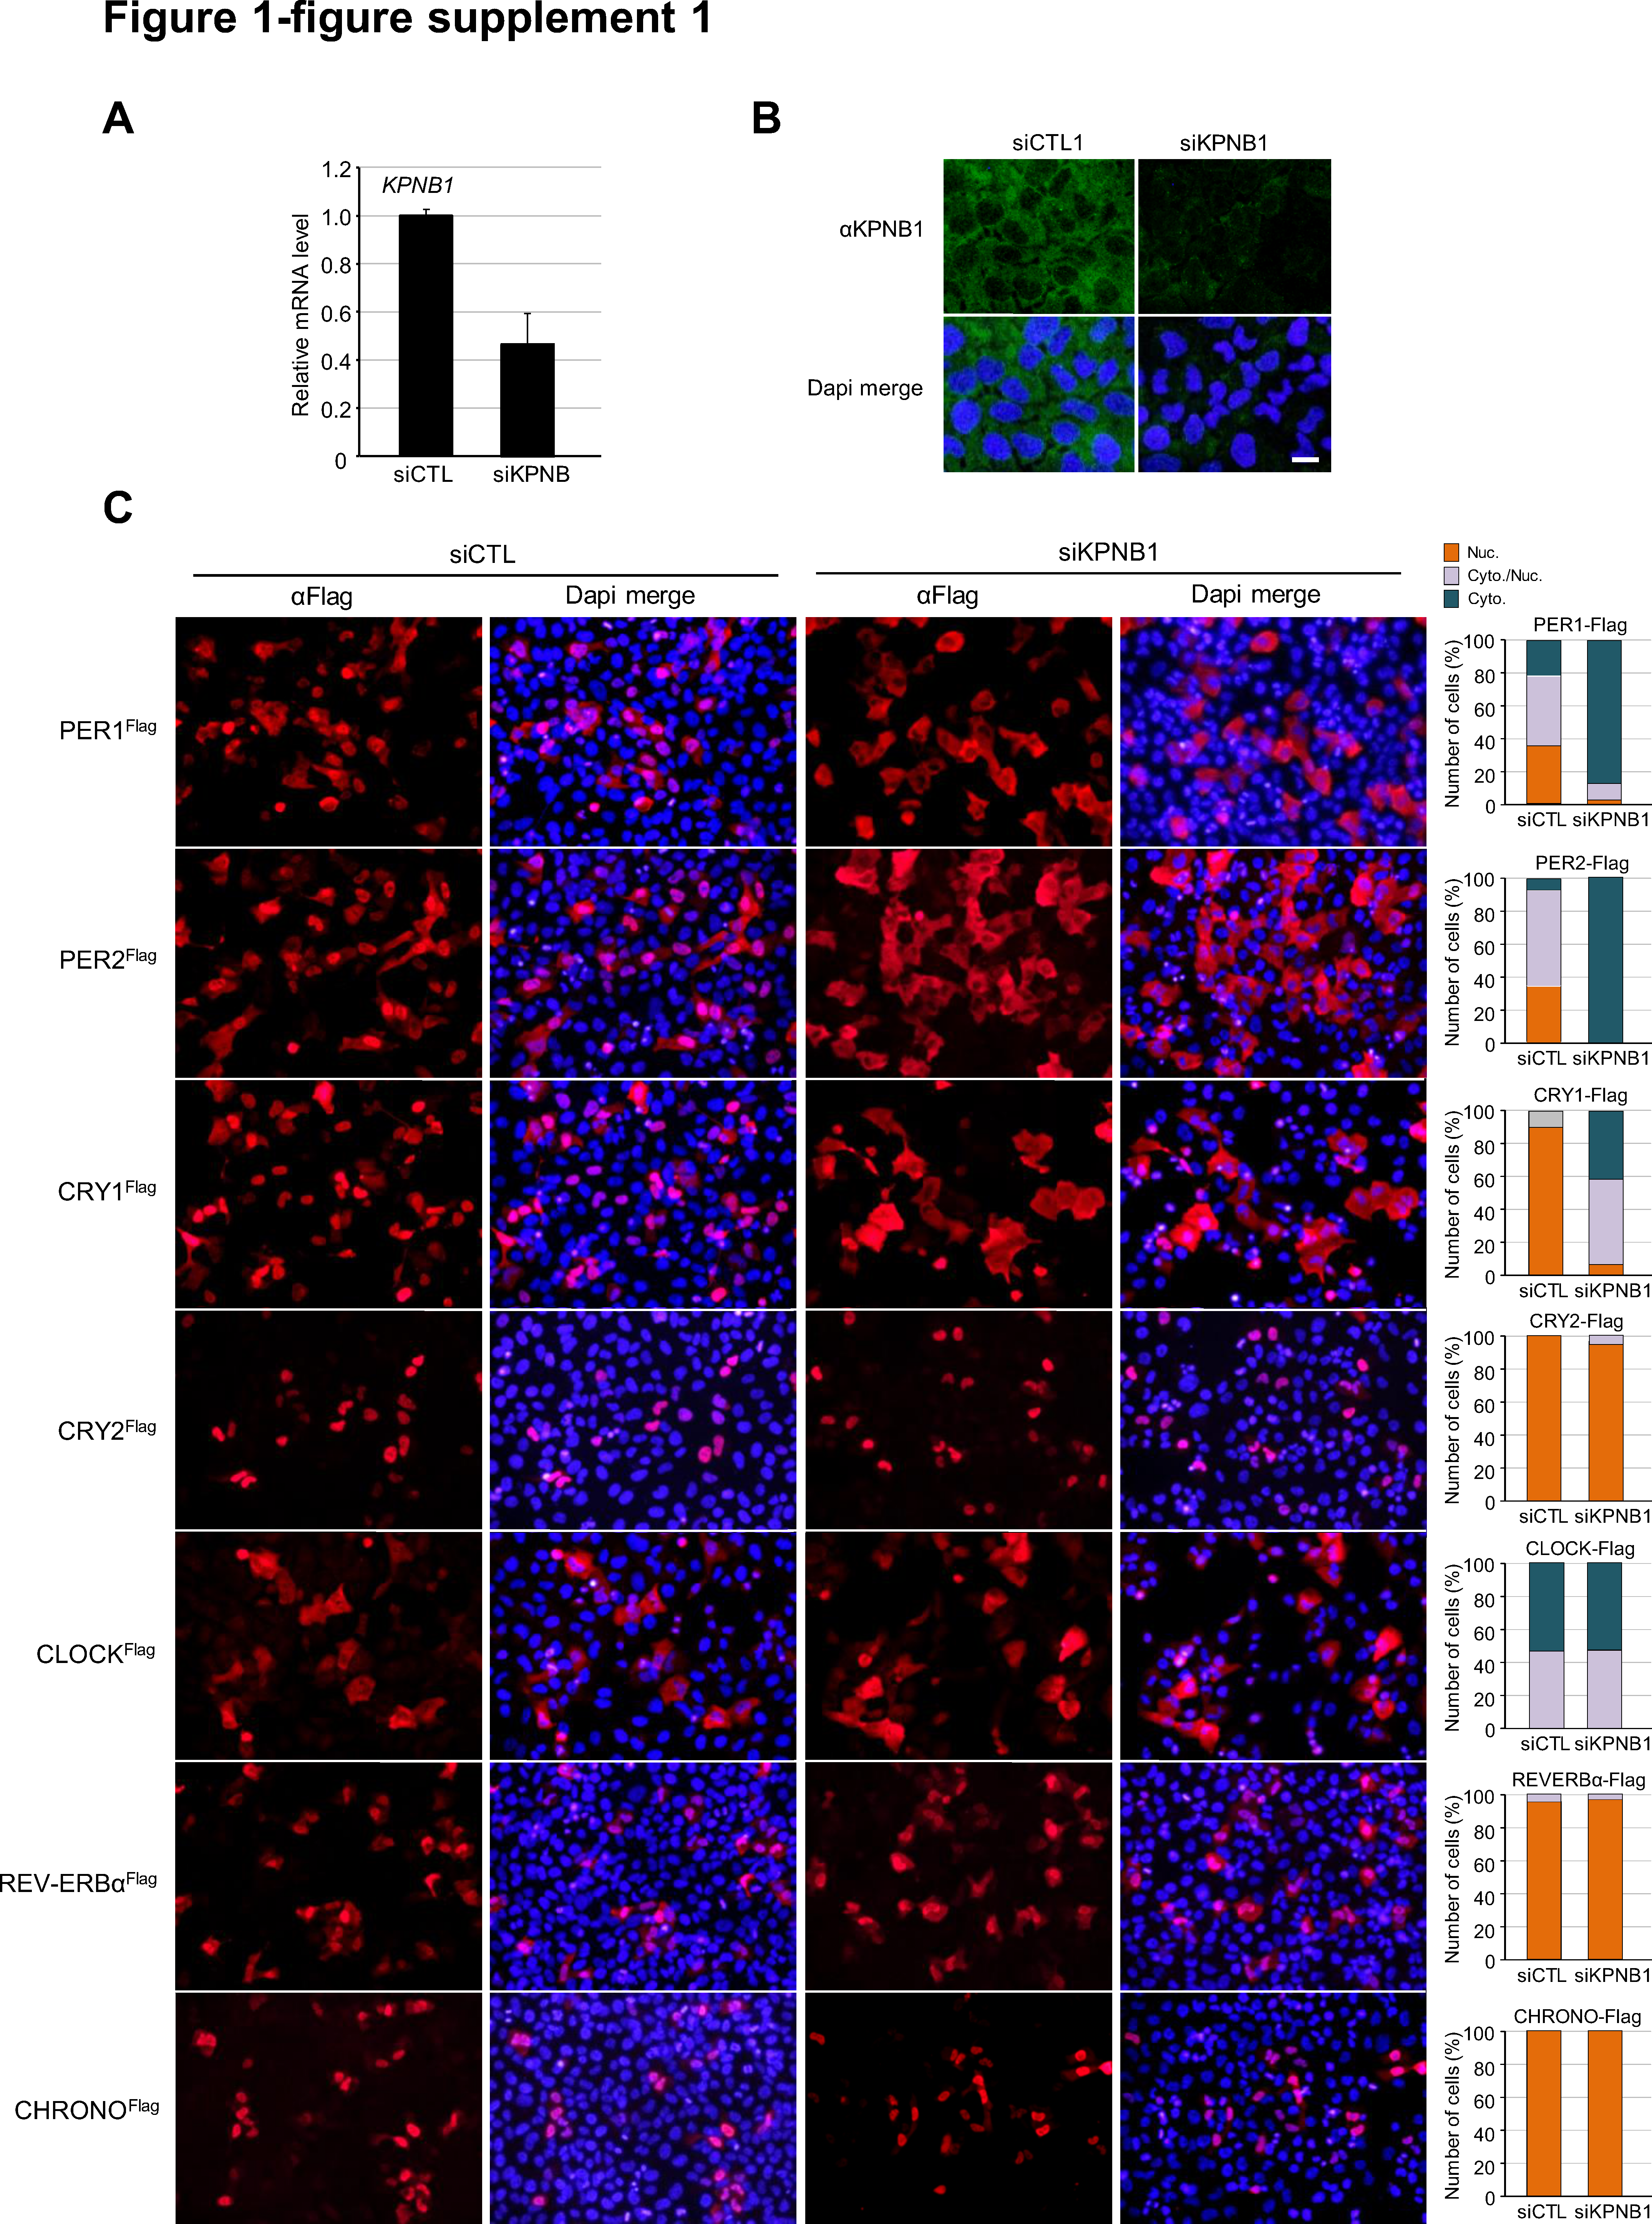

Supplement: supp [file elife-08647-supp-v1.zip › elife_poa_e08647_Figure_1_figure_supplement_1.tif]

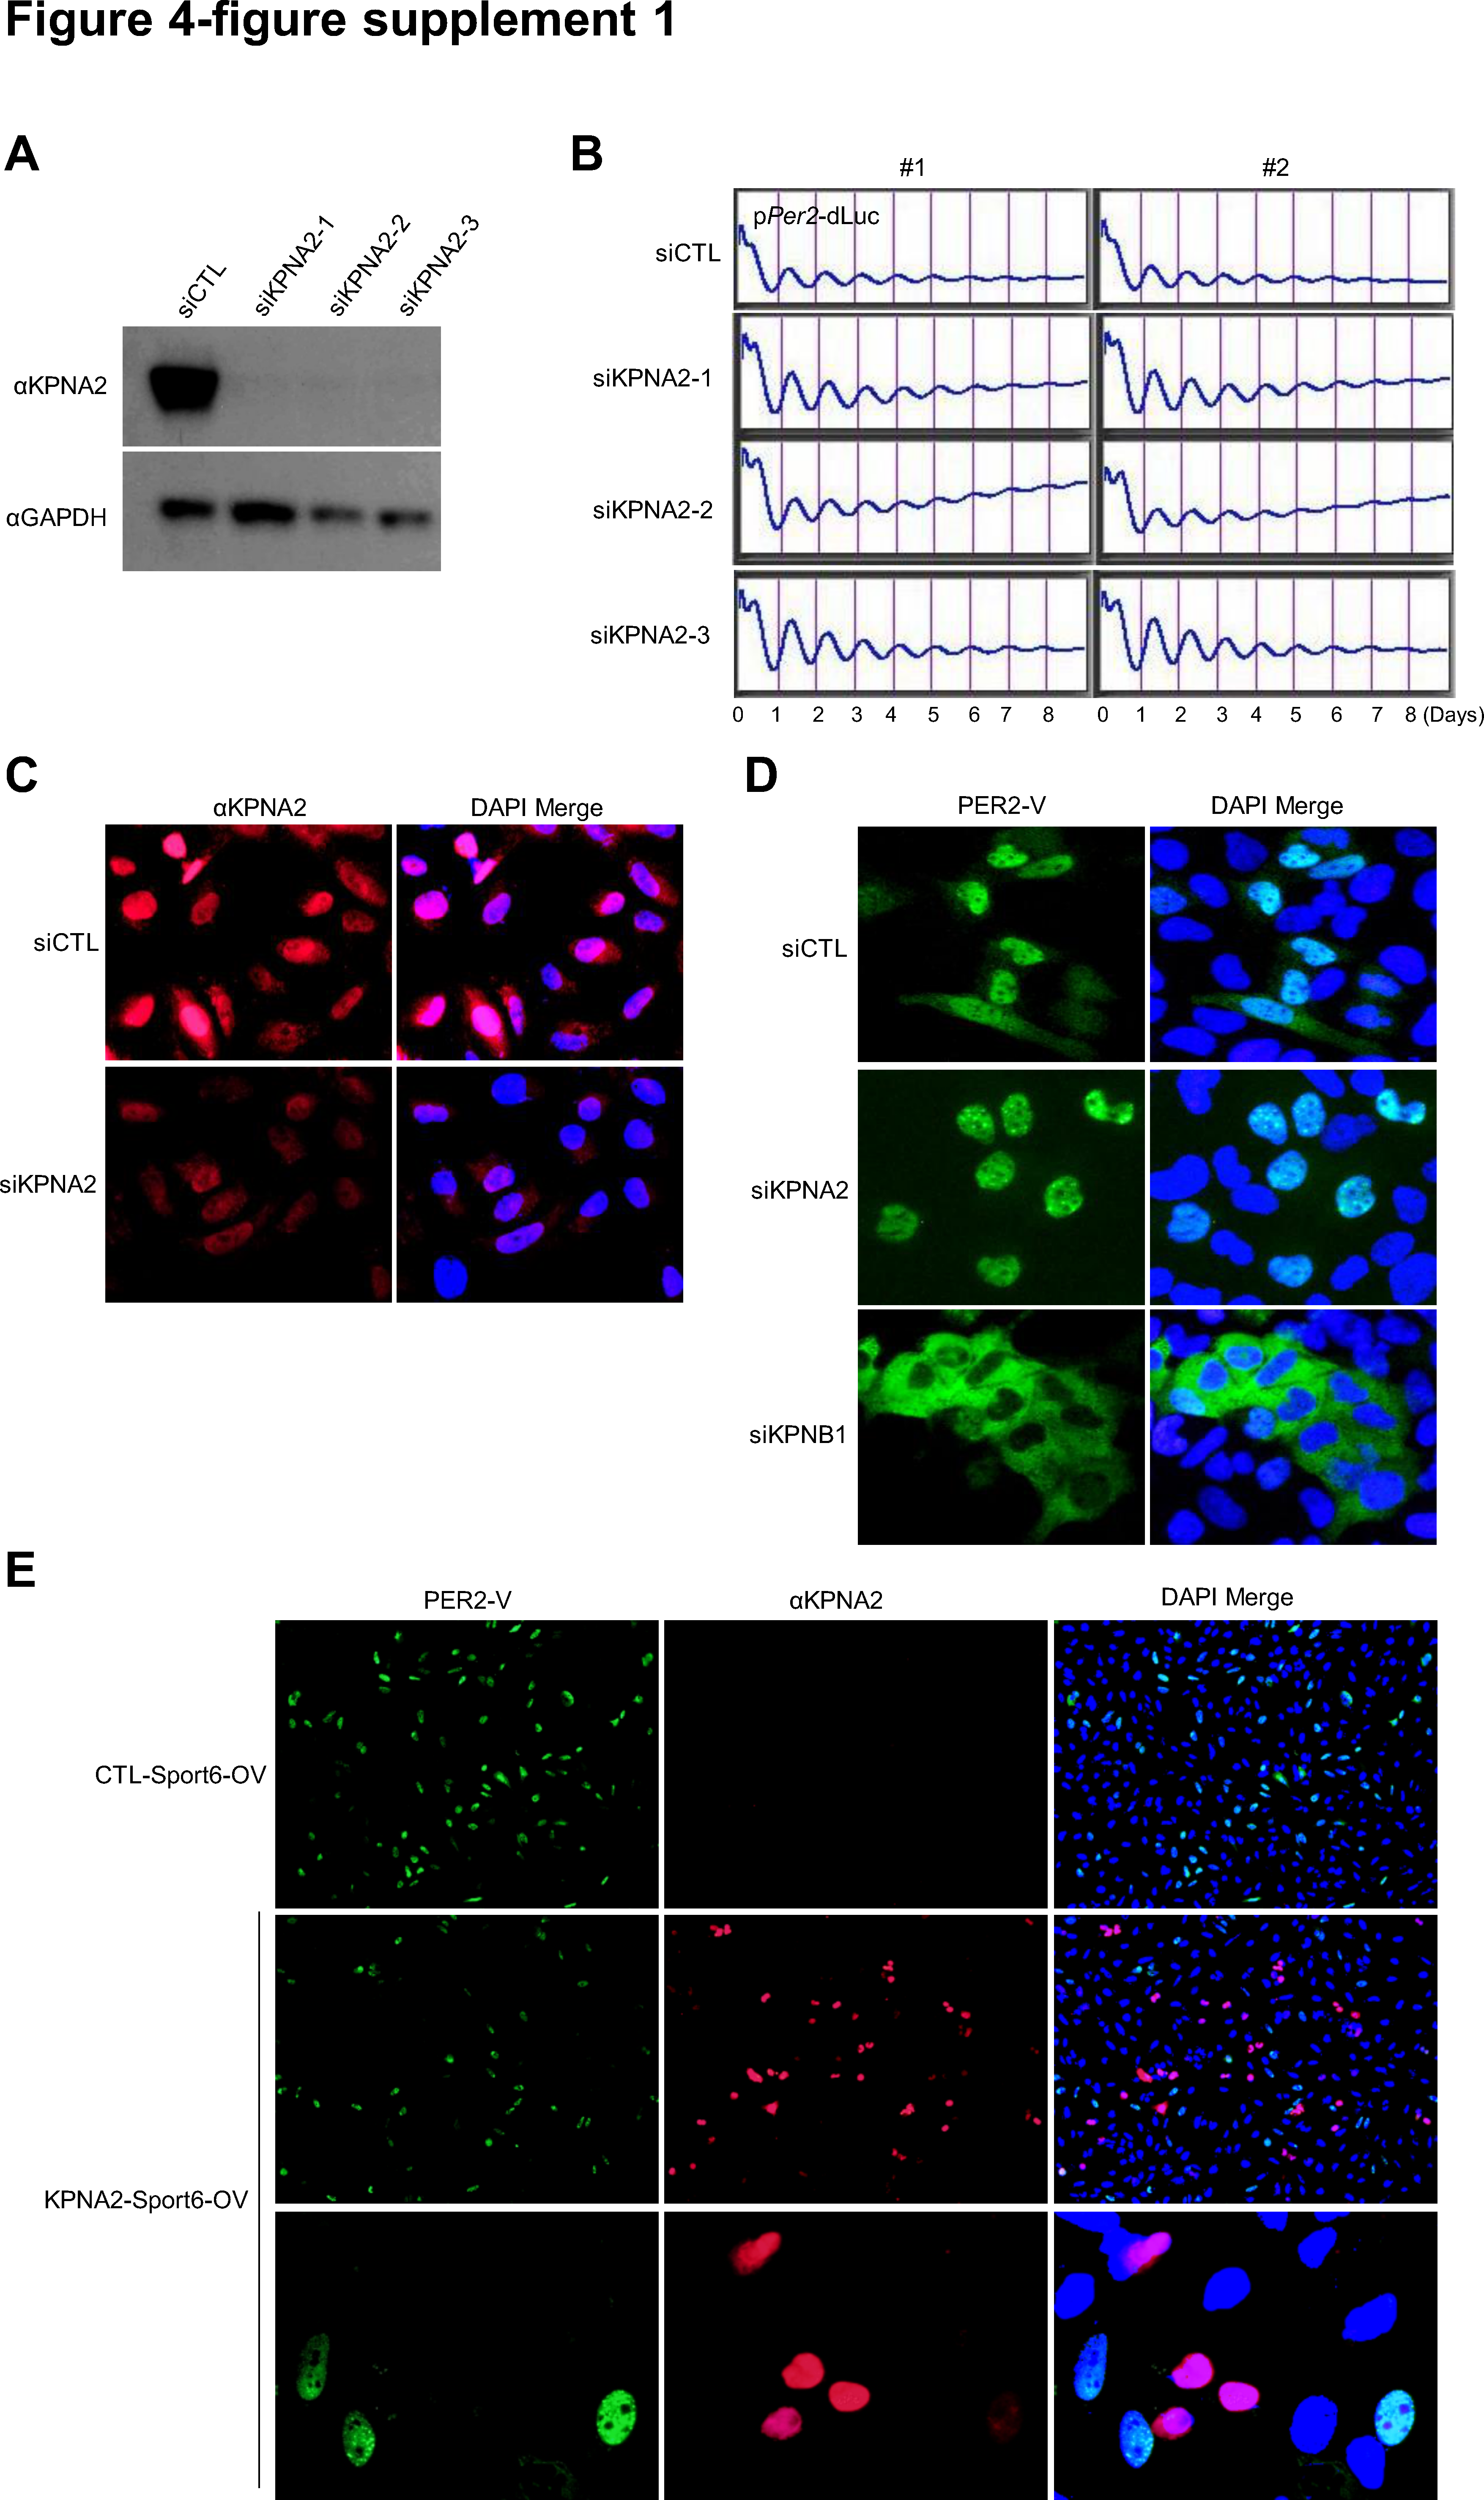

Supplement: supp [file elife-08647-supp-v1.zip › elife_poa_e08647_Figure_4_figure_supplement_1.tif]

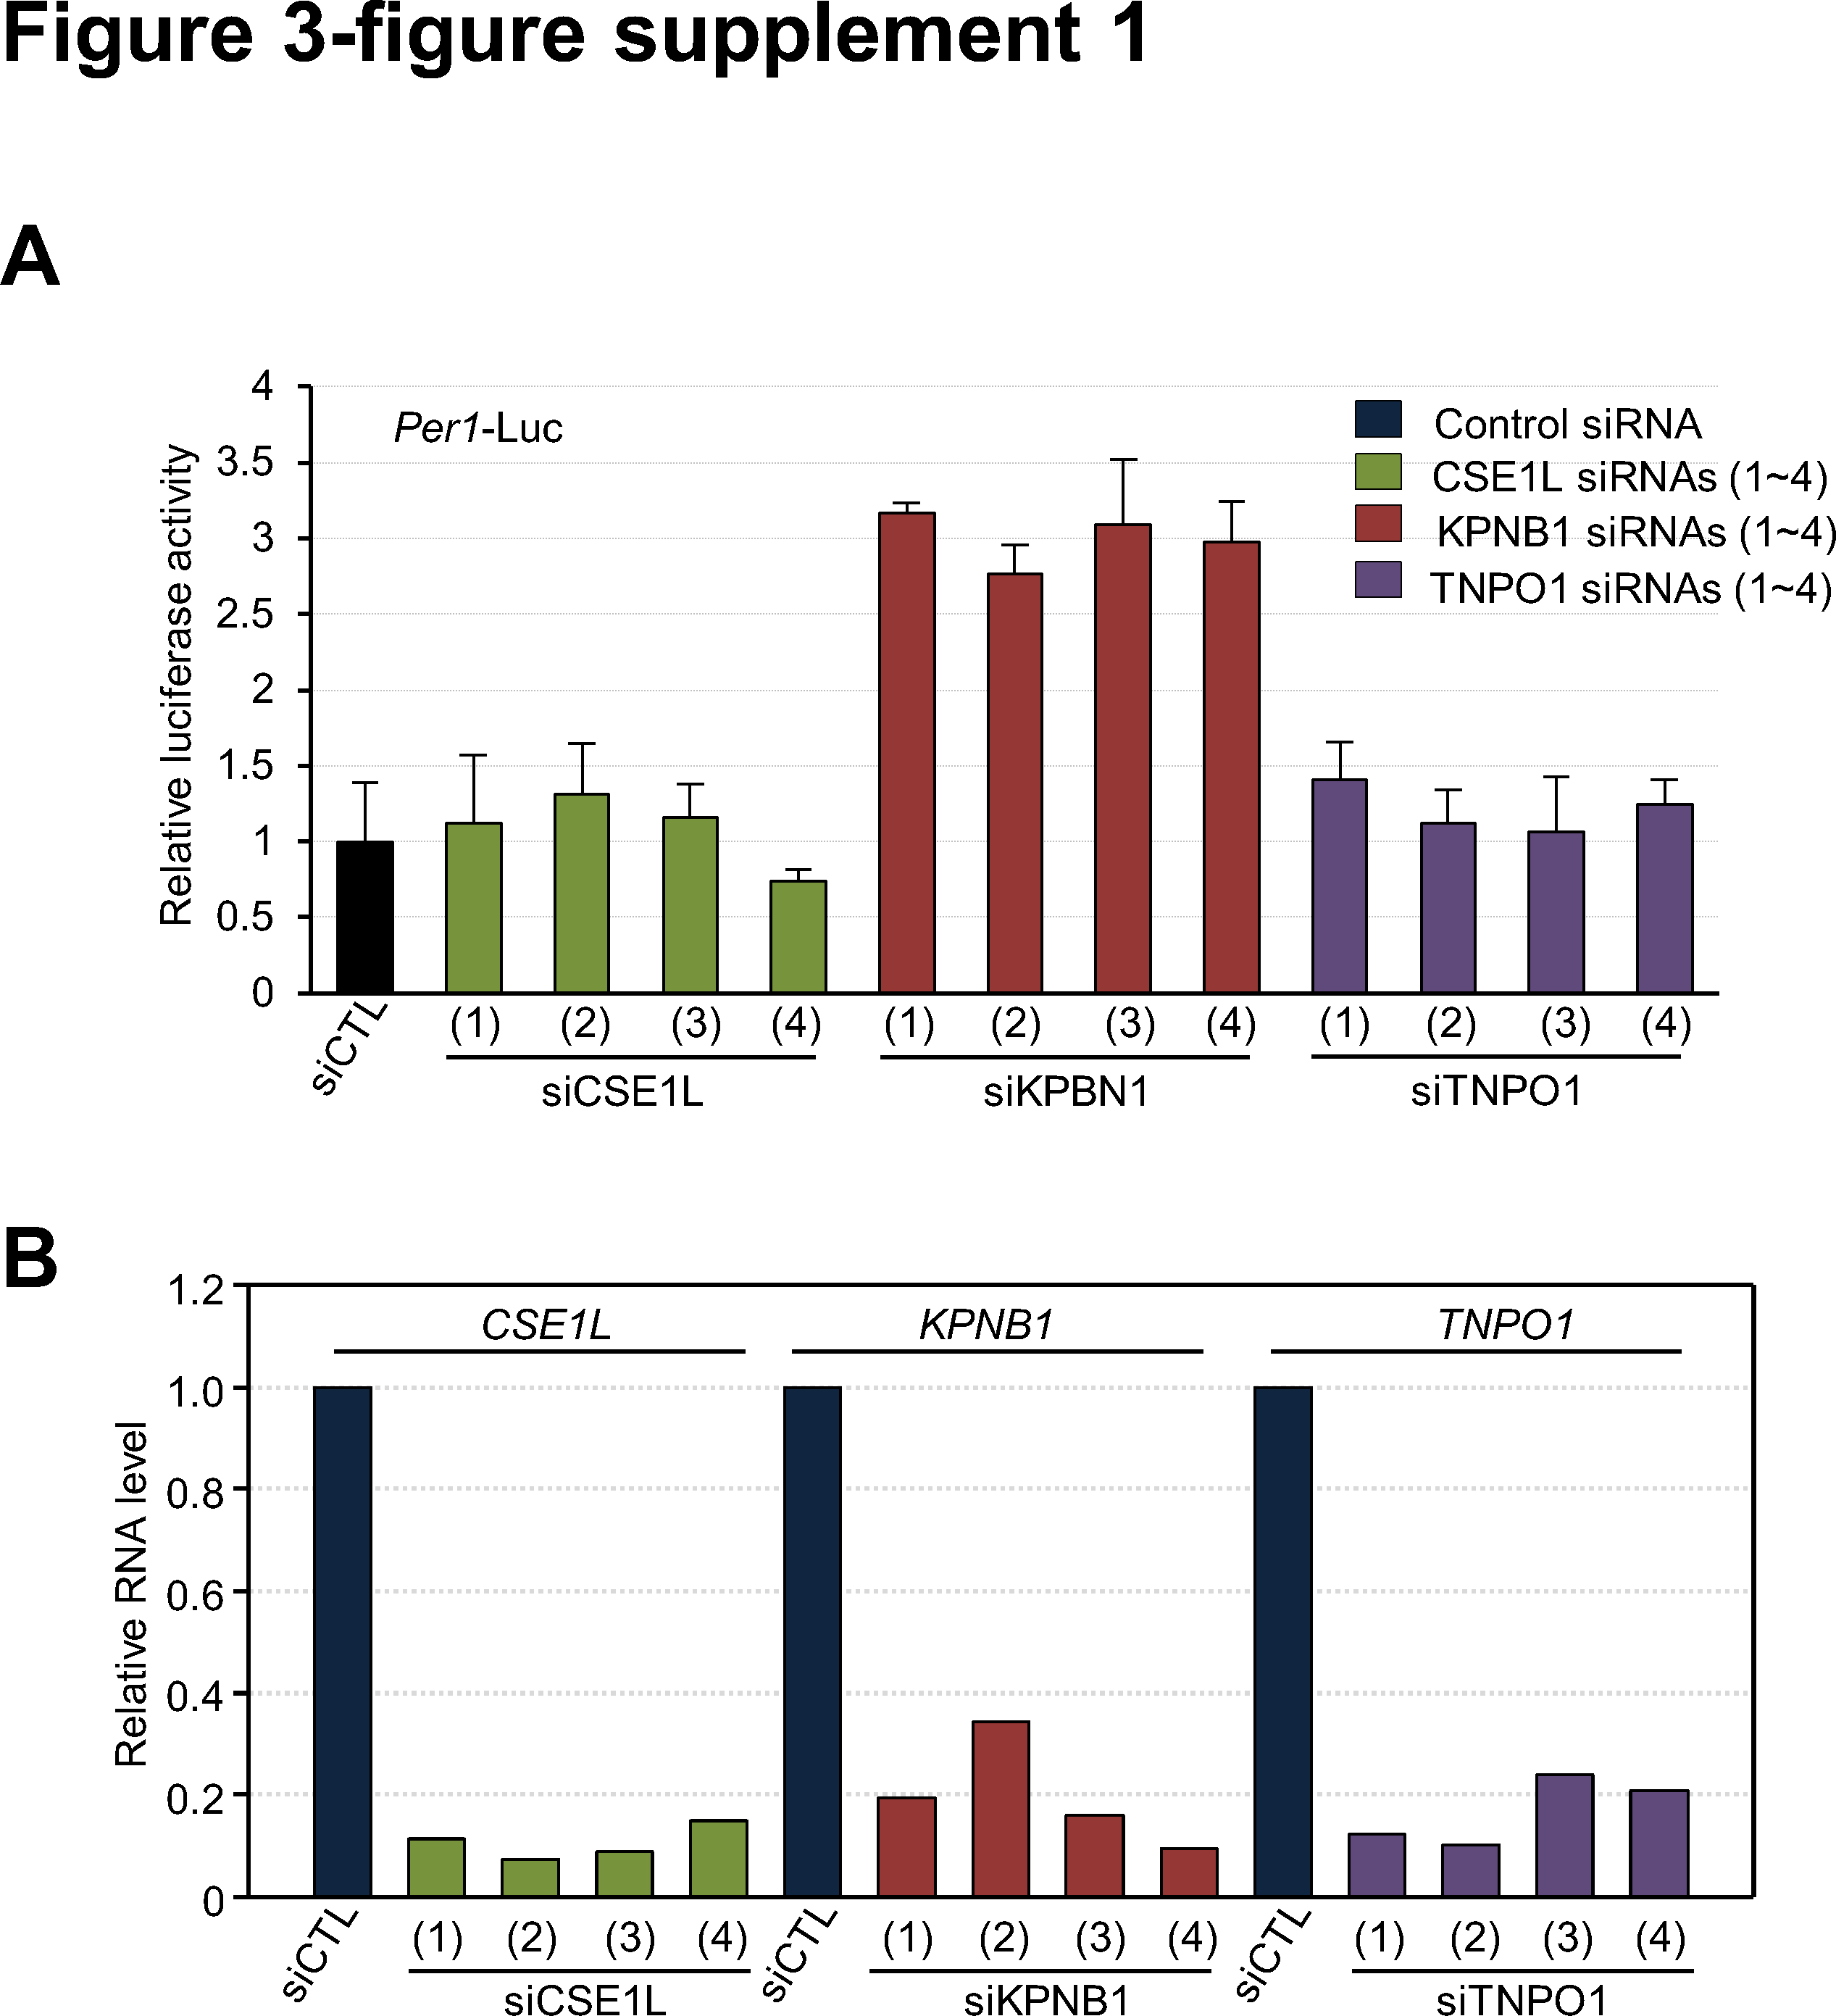

Supplement: supp [file elife-08647-supp-v1.zip › elife_poa_e08647_Figure_3_figure_supplement_1.tif]

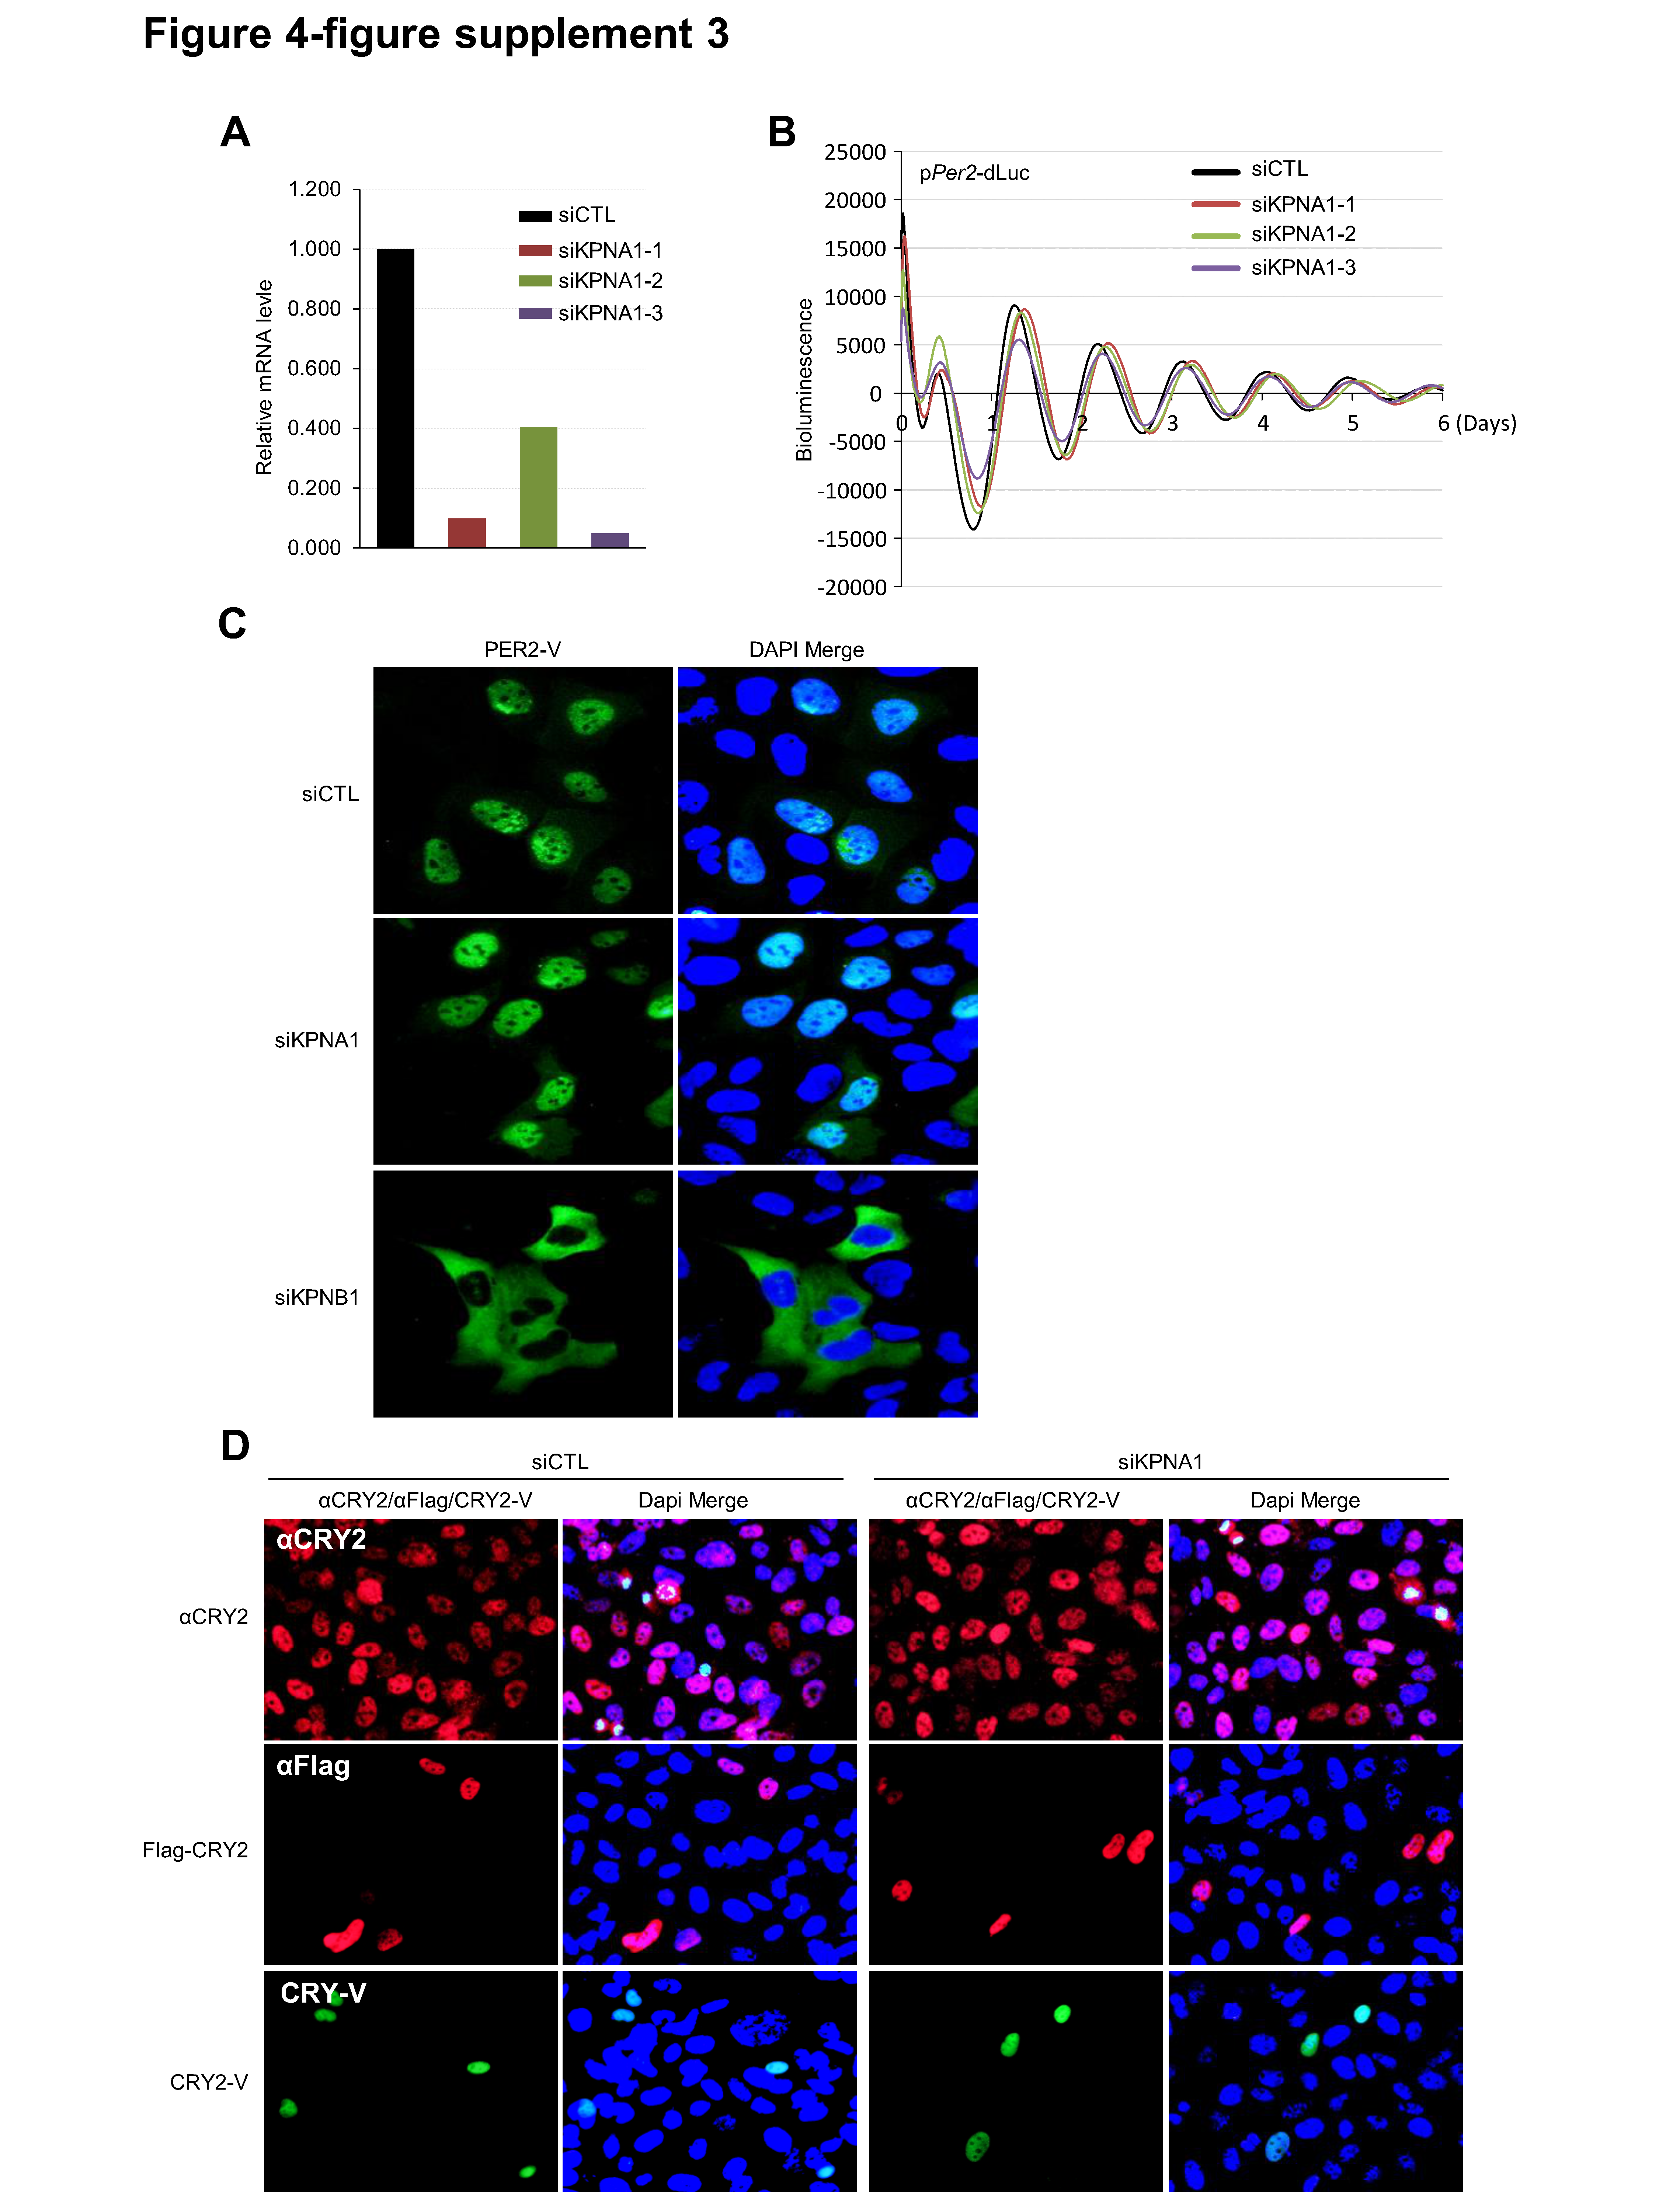

Supplement: supp [file elife-08647-supp-v1.zip › elife_poa_e08647_Figure_4_figure_supplement_3.tif]

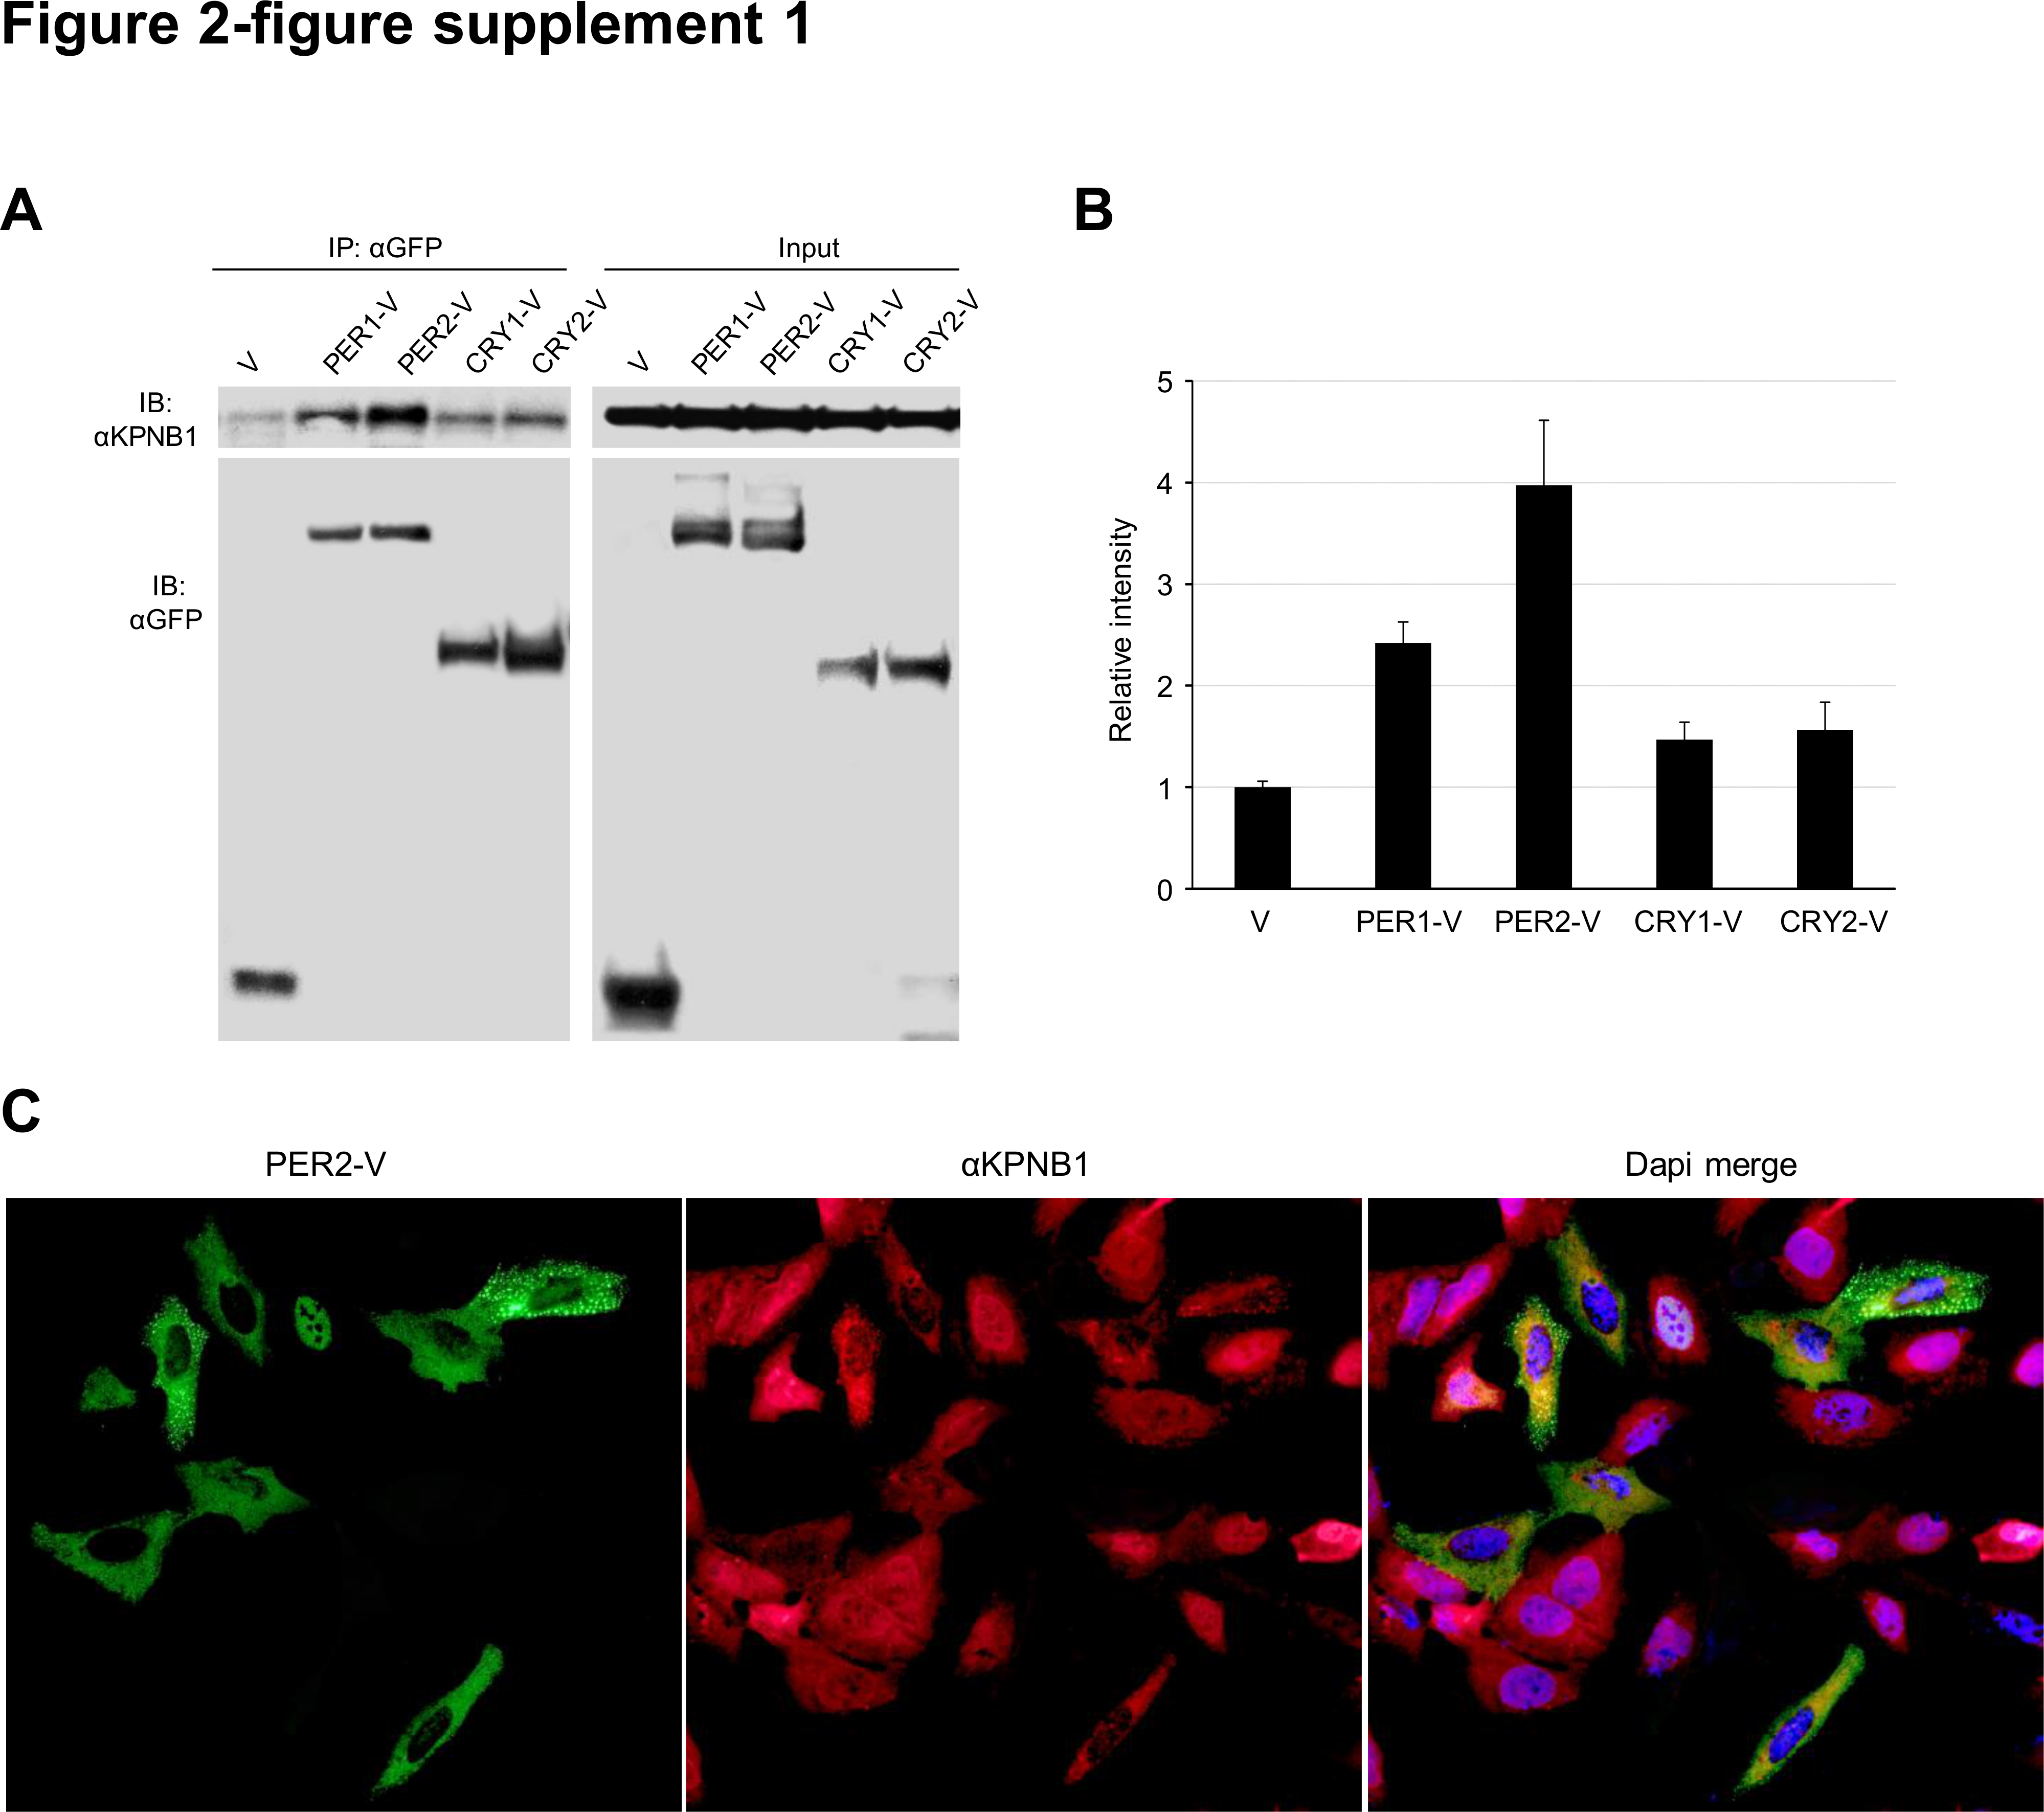

Supplement: supp [file elife-08647-supp-v1.zip › elife_poa_e08647_Figure_2_figure_supplement_1.tif]
